# Supplementary material for: Structural insights into semicrystalline states of electrospun nanofibers: a multiscale analytical approach
Source: Royal Society of Chemistry journal article supplement (doi:10.1039/c9nr00446g), 2019-01-01
Supplement: c9nr00446g1.pdf [file c9nr00446g1.pdf]

## (Supporting Information)

### Structural Insights into Semicrystalline States of Electrospun Nanofibers: a Multiscale Analytical Approach

Anjani K. Maurya<sup>1, 2, 5</sup>, Lukas Weidenbacher<sup>2, 3, 6</sup>, Fabrizio. Spano<sup>2</sup>, Giuseppino Fortunato<sup>2</sup>, René M. Rossi<sup>2</sup>, Martin Frenz<sup>4</sup>, Alex Dommann<sup>1, 5</sup>, Antonia Neels<sup>1, 7\*</sup>, Amin Sadeghpour<sup>1, 2, 3\*</sup>

<sup>1</sup>*Empa, Swiss Federal Laboratories for Materials Science and Technology, Center for X-ray Analytics, St. Gallen, Switzerland*

<sup>2</sup>*Empa, Swiss Federal Laboratories for Materials Science and Technology, Laboratory for Biomimetic Membranes and Textiles, St. Gallen, Switzerland*

<sup>3</sup>*Empa, Swiss Federal Laboratories for Materials Science and Technology, Laboratory of Biointerfaces, St. Gallen, Switzerland*

<sup>4</sup>*Institute of Applied Physics, University of Bern, Bern, Switzerland*

<sup>5</sup>*Cellular and Biomedical Sciences, Faculty of Medicine, University of Bern, Bern, Switzerland*

<sup>6</sup>*Institute for Biomechanics, Department of Health Sciences and Technology, ETH Zürich, Zürich, Switzerland*

<sup>7</sup>*Department of Chemistry, University of Fribourg, Fribourg, Switzerland*

\*Corresponding author: amin.sadeghpour@empa.ch

\*Corresponding author: Antonia.neels@empa.ch

*Ruland method to determine the degree of orientation of nanofibers:*

Ruland method was applied to the SAXS profiles nanofibers membrane samples aligned at 1000 rpm, 1500 rpm and 2000 rpm rotating drum speed and corresponding misorientation width was calculated. The values of calculated misorientation width are listed in the table (1) of main manuscript.

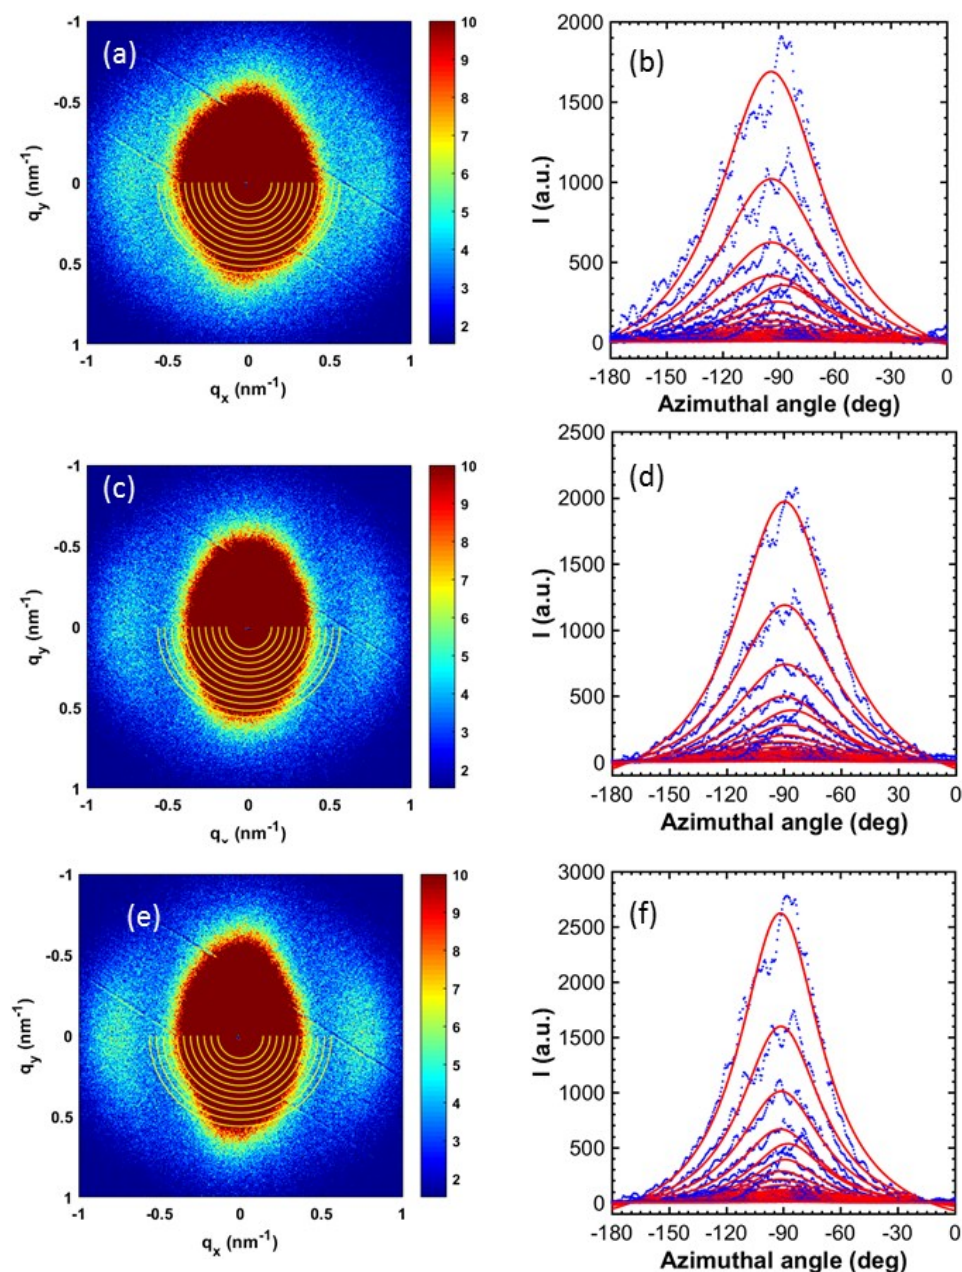

Figure (1). (a) (c) and (e) are the zoomed in part the 2D SAXS profile which are indicating the streak like single and azimuthal profile indicated by yellow line at different  $q$  for aligned samples at 1000 rpm, 1500 rpm and 2000 rpm respectively. (b), (d) and (f) are their corresponding azimuthal scans and Lorentzian fits.

## Atomic Force Microscopy (AFM)

Below is the vertical and horizontal line scans in the selected area with respect to nanofiber axis. Average roughness was calculated by taking the average of all scans for both directions according to the following equation

$$R_a = \frac{1}{n} \sum_{i=1}^n |z_i| \quad (\text{S1})$$

where  $n$  is the number of points in the profile, and  $z_i$  is the height value at point  $i$  obtained from filtered height images. The values reported in the main manuscript are the average over 10 scans.

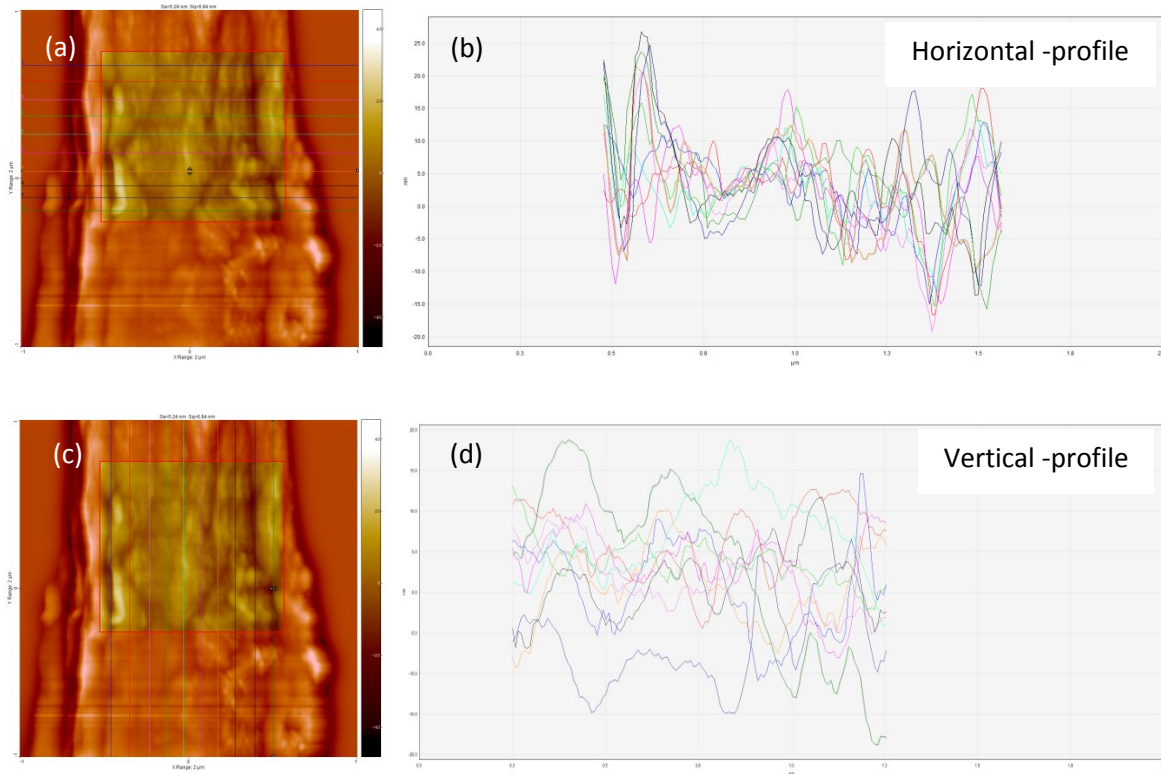

Figure (2). (a) and (c) AFM height images indicating the lines where 1D profile was extracted in horizontal and vertical directions respectively. (b) and (d) are their corresponding 1D profiles.
